# Supplementary material for: A Predictive Model for Assessing Surgery-Related Acute Kidney Injury Risk in Hypertensive Patients: A Retrospective Cohort Study
Source: PLOS journal article supplement (doi:10.1371/journal.pone.0165280), 2016-11-01
Supplement: S4 (10.1371/journal.pone.0165280.s004) [file journal.pone.0165280.s004]

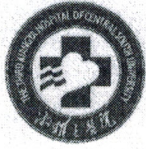

# 中南大学湘雅三医院

The Third Xiangya Hospital of Central South University

## 科学研究项目审批件

### Approval for Scientific Research Project

No: 2016-149

|                        |                                                                                                                                                                                                                                                                                                                                                                                                                                                                                                                                 |                                    |                    |                  |                                                                                              |
|------------------------|---------------------------------------------------------------------------------------------------------------------------------------------------------------------------------------------------------------------------------------------------------------------------------------------------------------------------------------------------------------------------------------------------------------------------------------------------------------------------------------------------------------------------------|------------------------------------|--------------------|------------------|----------------------------------------------------------------------------------------------|
| 项目名称<br>Project Title  | 高血压患者手术相关急性肾损伤的风险评估模型<br>Model for Assessing surgery related AKI in hypertension patients                                                                                                                                                                                                                                                                                                                                                                                                                                       |                                    |                    |                  |                                                                                              |
| 专业科室<br>Department     | 心内科/临床药理中心<br>Cardiology/Clinical<br>Pharmacology Center                                                                                                                                                                                                                                                                                                                                                                                                                                                                        | 主要研究者<br>Principal<br>Investigator | 袁洪<br>Hong<br>Yuan | 承担责任<br>Position | 负责 In charge <input checked="" type="checkbox"/><br>参与 Participants <input type="checkbox"/> |
| 研究分类<br>Classification | 1 病理标本研究 Pathology specimens research <input type="checkbox"/><br>2 人体试验 Human research <input checked="" type="checkbox"/><br>3 人体组织或细胞实验 Human tissue or cell experiments <input type="checkbox"/><br>4 胚胎克隆研究 Research of embryonic clone <input type="checkbox"/><br>5 其他研究 Other research <input type="checkbox"/>                                                                                                                                                                                                         |                                    |                    |                  |                                                                                              |
| 审查意见<br>Conclusion     | 同意 Agree <input checked="" type="checkbox"/> ; 作必要修正后同意 Agree after necessary revisions <input type="checkbox"/> ;<br>不同意 Disagree <input type="checkbox"/> ; 终止或暂停已批准的试验 Termination or suspension of the<br>approved research <input type="checkbox"/>                                                                                                                                                                                                                                                                        |                                    |                    |                  |                                                                                              |
| 审查声明<br>Statement      | <p>兹证明本研究的设计和方法符合相关法规（GCP、ICH-GCP 等）和伦理原则的要求。伦理委员会批准本研究项目在本院执行。</p> <p>This is to certify that the design and methods of the research are in accordance with the requirements of related regulations and procedures (such as GCP, ICH-GCP) as well as the ethical principles. The IRB has approved the research to be conducted in our hospital.</p> <p style="text-align: right;">中南大学湘雅三医院伦理委员会医学伦理分委员会<br/>The IRB of Third Xiangya Hospital, Central South University</p> <p style="text-align: right;">2016 年 4 月 25 日</p> |                                    |                    |                  |                                                                                              |
